# Supplementary material for: Direct Patterning of Carbon Nanotube via Stamp Contact Printing Process for Stretchable and Sensitive Sensing Devices
Source: PubMed Central journal article supplement (PMC7770666; doi:10.1007/s40820-019-0323-8), 2019-10-23
Supplement: 40820_2019_323_MOESM1_ESM.pdf [file 40820_2019_323_MOESM1_ESM.pdf]

Supporting Information for

## Direct Patterning of Carbon Nanotube *via* Stamp Contact Printing

### Process for Stretchable and Sensitive Sensing devices

Binghao Liang<sup>1</sup>, Zian Zhang<sup>1</sup>, Wenjun Chen<sup>1</sup>, Dongwei Lu<sup>1</sup>, Leilei Yang<sup>1</sup>, Rongliang Yang<sup>1</sup>, Hai Zhu<sup>2</sup>, Zikang Tang<sup>3</sup>, Xuchun Gui<sup>1</sup>, \*

<sup>1</sup>State Key Laboratory of Optoelectronic Materials and Technologies, School of Electronics and Information Technology, Sun Yat-sen University, Guangzhou 510275, People's Republic of China

<sup>2</sup>State Key Laboratory of Optoelectronic Materials and Technologies, School of Physics, Sun Yat-Sen University, Guangzhou 510275, People's Republic of China

<sup>2</sup>Institute of Applied Physics and Materials Engineering, University of Macau, Avenida da Universidade, Taipa, Macau, People's Republic of China

\*Corresponding author. E-mail: [guixch@mail.sysu.edu.cn](mailto:guixch@mail.sysu.edu.cn) (Xuchun Gui)

### Supplementary Figures

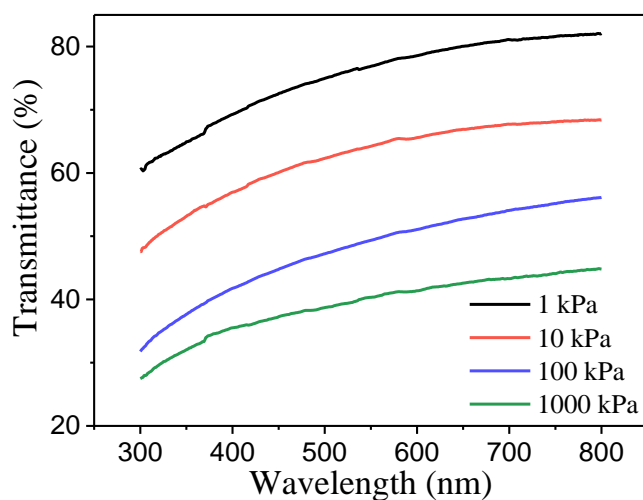

**Fig. S1** Transmittance of the CNT films under different stamp pressure

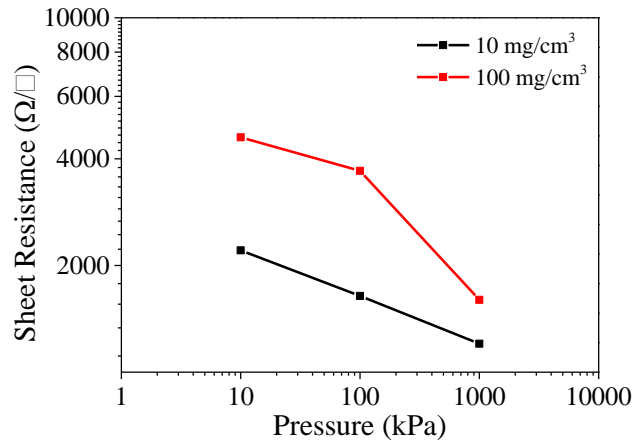

**Fig. S2** Sheet resistance of CNT films fabricated using CNT seal with different density

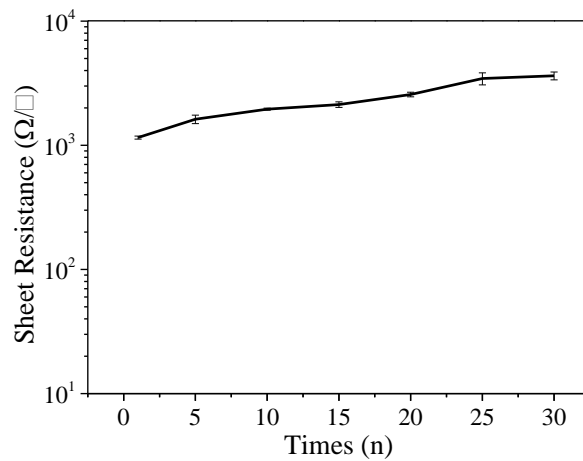

**Fig. S3** Sheet resistance of different CNT films fabricated using the same CNT seal

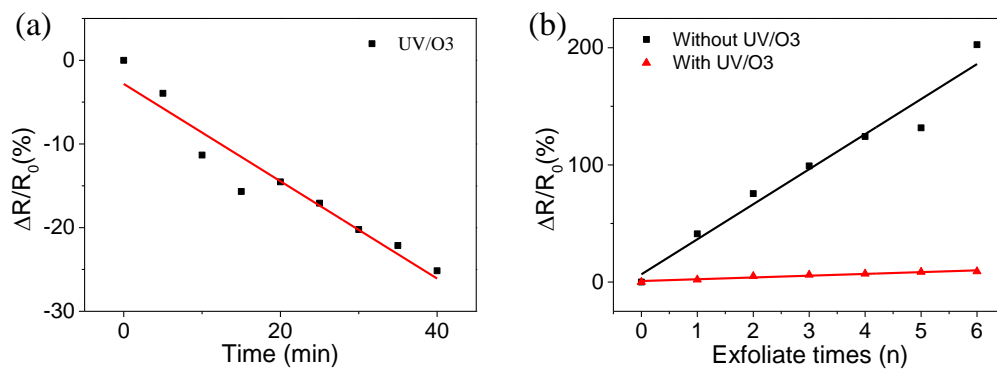

**Fig. S4** Influence of UV/O<sub>3</sub> treatment on conductivity of CNT film. (a) Relative resistance changes of the same sample after different times of UV/O<sub>3</sub> treatment. (b) Relative resistance changes of the original CNT film after multiple transfers, in which a fresh Ecoflex covered on the original as-prepared CNT/Ecoflex thin film and peeled off to transfer CNT

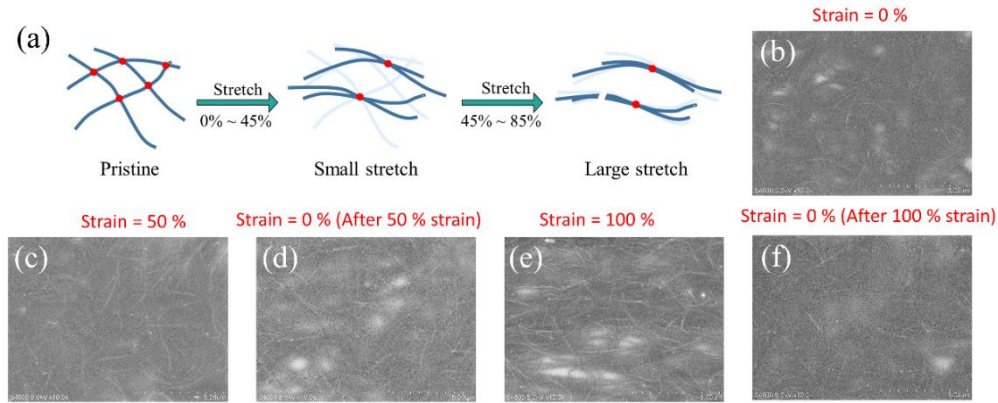

**Fig. S5** Schematic and SEM images illustrated the sensing mechanism of the strain sensors. **(a)** Schematic illustration of the sensing mechanism of CNT-based strain sensor. **(b)** SEM image of CNT-based strain sensor before stretch. **(c)** SEM image of CNT-based sensor under stretching strain of 50%. **(d)** SEM image of CNT-based strain sensor released from 50% stretching strain. **(e)** SEM image of CNT-based strain sensor under stretching strain of 50%. **(f)** SEM image of CNT-based strain sensor released from 100% stretching strain

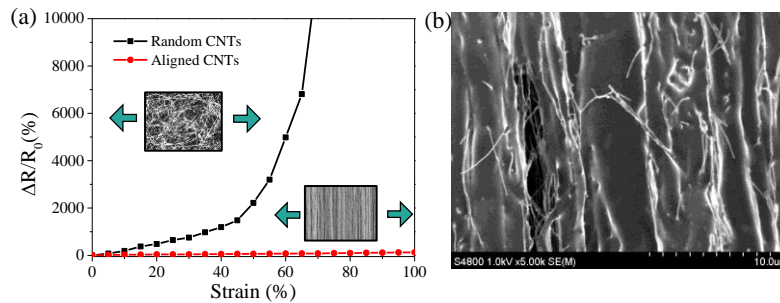

**Fig. S6 (a)** Comparison of CNT-based strain sensors fabricated by using random CNT seal and aligned CNT seal. **(b)** SEM image of the CNT array on Ecoflex substrate

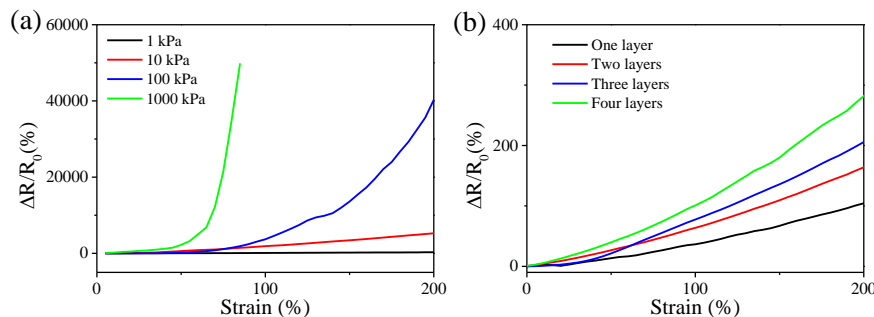

**Fig. S7** Electromechanical properties of CNT-based strain sensors. **(a)** Comparison of CNT strain sensor fabricated by different stamp pressure. **(b)** Comparison of CNT strain sensor fabricated by different transfer times

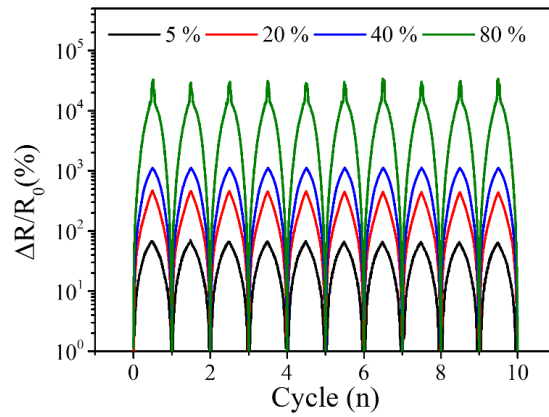

**Fig. S8** The difference of relative resistance under different maximum applied strain

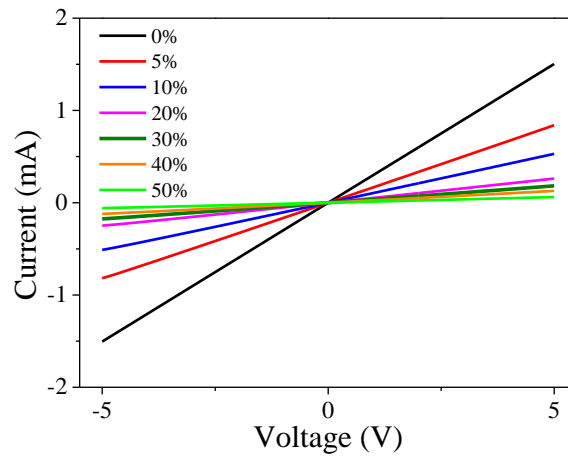

**Fig. S9**  $I/V$  curves of CNT-based strain sensor under different stretching strain

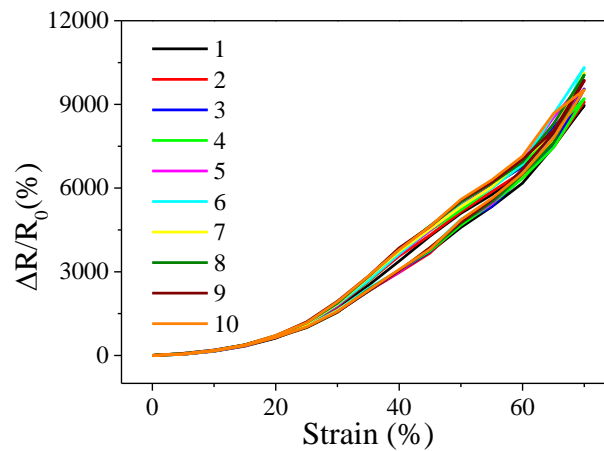

**Fig. S10** Repeatability of CNT-based strain sensor for 10 stretching/releasing cycles under 70% applied strain

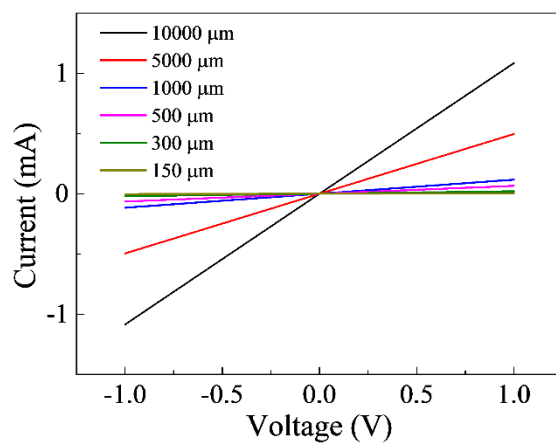

**Fig. S11**  $I/V$  curves of CNT-based strain sensors with different CNT strips width
